# Supplementary material for: Surface-designed AuNPs-based fluorescent probe for ultra-sensitive detection of oral poultry antibacterial drug furaltadone via intermolecular hydrogen bonding
Source: Royal Society of Chemistry journal article supplement (doi:10.1039/d4ra04293j), 2024-01-01
Supplement: d4ra04293j1.pdf [file d4ra04293j1.pdf]

## Supporting Information

### Surface-designed AuNPs-based Fluorescent Probe for Ultra-sensitive detection of Oral Poultry Antibacterial drug Furaltadone via Intermolecular Hydrogen Bonding<sup>†</sup>

A. Sowndarya,<sup>1</sup> T. Daniel Thangadurai,<sup>1\*</sup> N. Manjubaashini,<sup>2</sup> M. Pavithrakumar<sup>3</sup>, K. Senthilkumar,<sup>3</sup> D. Nataraj,<sup>3</sup> K. Kadirvelu,<sup>4</sup> K. Naveen Kalagatur<sup>4</sup>

<sup>1</sup>*Department of Chemistry, and Centre for Research and Development, KPR Institute of Engineering and Technology, Coimbatore 641407, India.*

<sup>2</sup>*National Centre for Nanoscience and Nanotechnology, University of Madras, Chennai 600025, India.*

<sup>3</sup>*Department of Physics, and <sup>4</sup>DRDO-Life Sciences, Bharathiar University, Coimbatore 641046, India.*

\*Corresponding author: Email: danielthangadurai.t@kpriet.ac.in.; Tel.: +91 422 263 5600.

#### 1. Experimental Section

##### 1.1. Preparation of Stock solution

A stock solution of PA@AuNPs and FTD was prepared by using double distilled water. The 1 mM working solution of PA@AuNPs was obtained by dilution of synthesized PA@AuNPs with 50 mL H<sub>2</sub>O. Simultaneously, the 100 μM of FTD stock solution (0.0032 g in 100 mL H<sub>2</sub>O) was prepared in a 50 mL beaker.

## 2. Characterization

### 2.1. Fluorescence studies

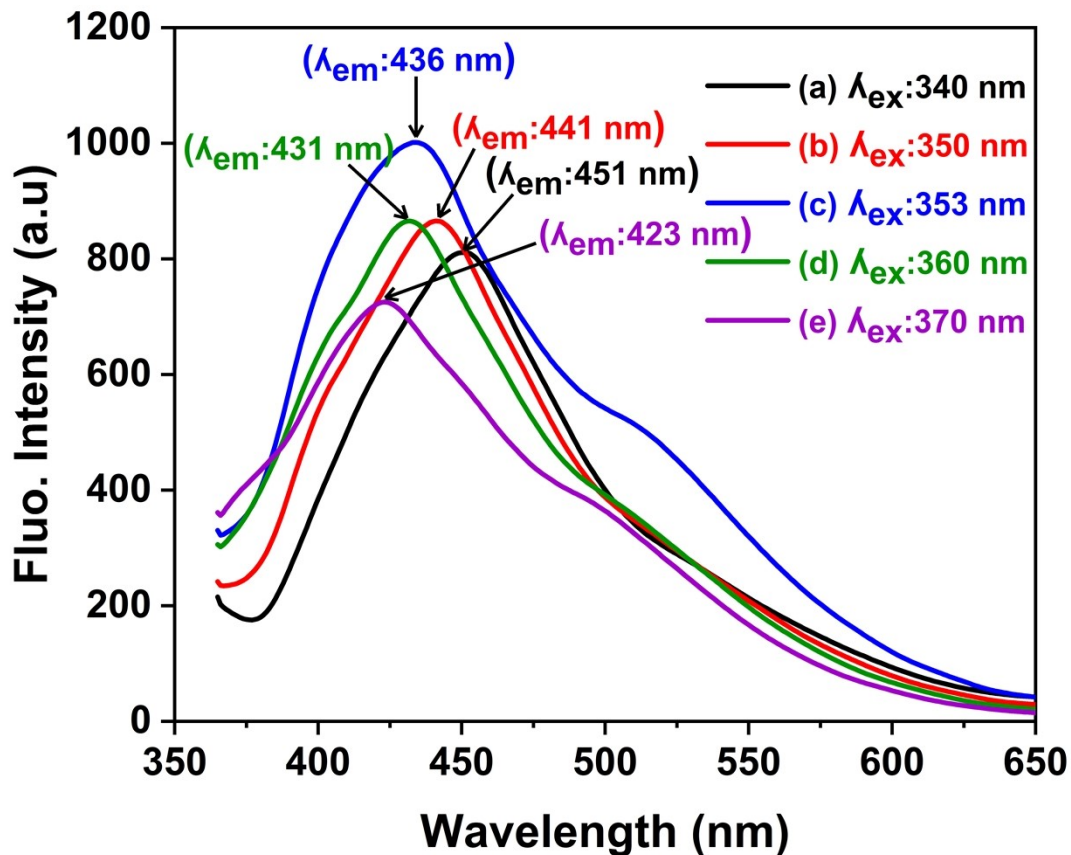

**Figure S11.** Fluorescence emission spectrum of PA@AuNPs using different excitation ( $\lambda_{ex}$  340, 350, 353, 360, and 370 nm).

2.2. Selectivity study

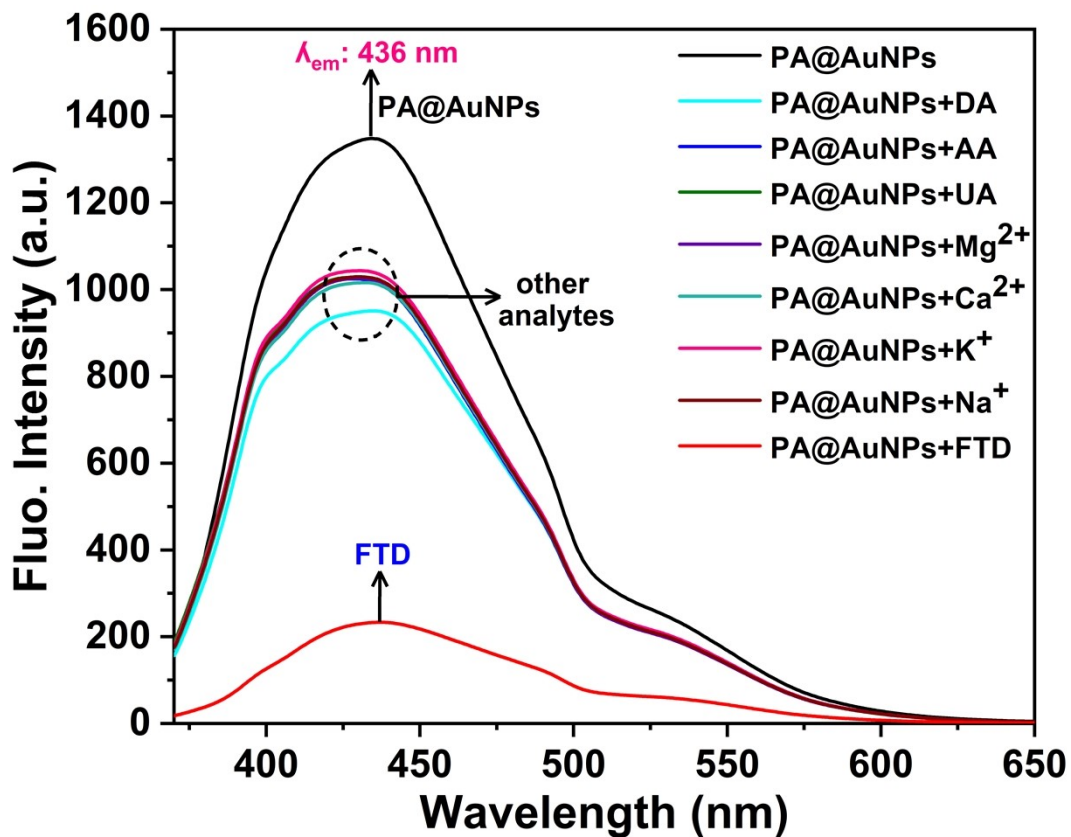

**Figure S12.** Fluorescence emission intensity changes of PA@AuNPs [1.0 mM] upon addition of various analytes [100 μM] (DA – Dopamine, AA – Ascorbic acid, UA – Uric acid,  $\text{Mg}^{2+}$  - Magnesium ions,  $\text{Ca}^{2+}$  - Calcium ions,  $\text{K}^+$  - Potassium ions,  $\text{Na}^+$  - Sodium ions, and FTD – Furaltadone) ( $\lambda_{ex}$  353 nm; slit width 5 nm).

### 2.3. Binding constant and LoD values

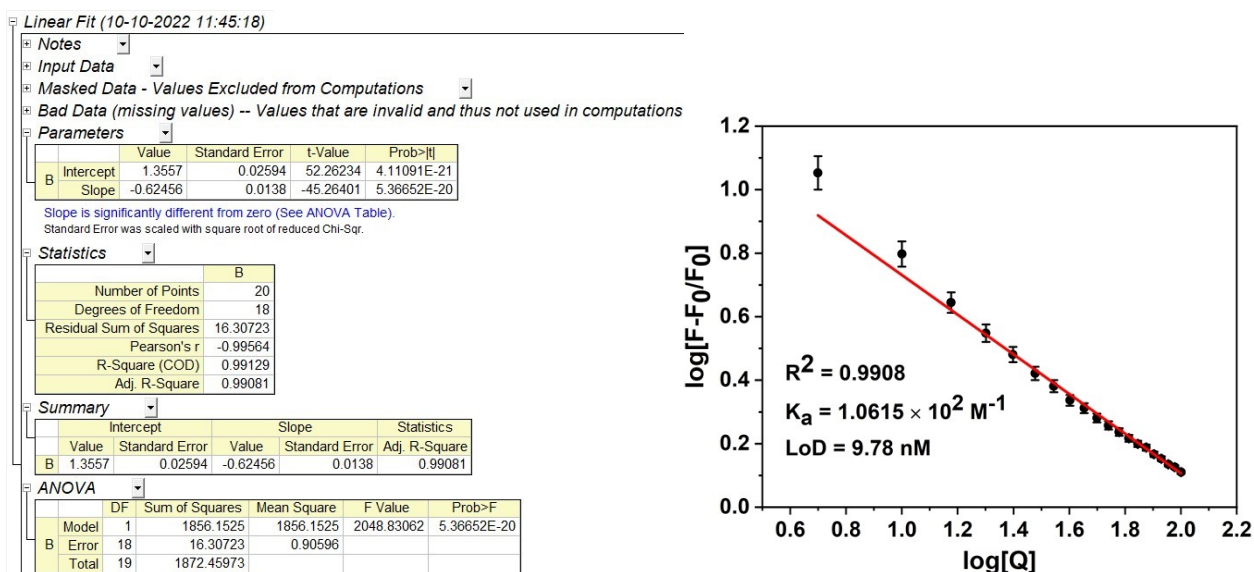

**Figure SI3.** Fluorescence emission intensity changes of PA@AuNPs upon the addition of FTD  $\log[F-F_0/F_0]$  against  $\log[Q]$ , binding constant ( $K_a$ ) calculated through linear fit ( $R^2 = 0.9908$ ;  $STD = 3\%$ ).

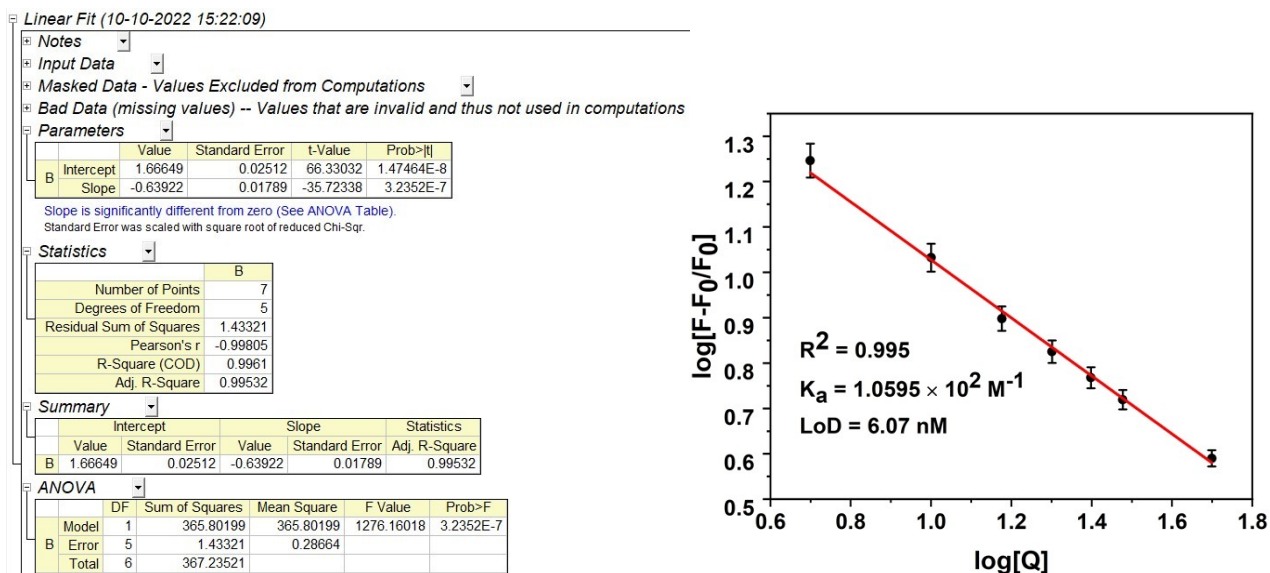

**Figure SI4.** Fluorescence emission intensity changes of PA@AuNPs upon the addition of blood serum and [FTD]  $\log[F-F_0/F_0]$  against  $\log[Q]$ , binding constant ( $K_a$ ) calculated through linear fit ( $R^2 = 0.995$ ;  $STD = 3\%$ ).

## 2.4. Interference study

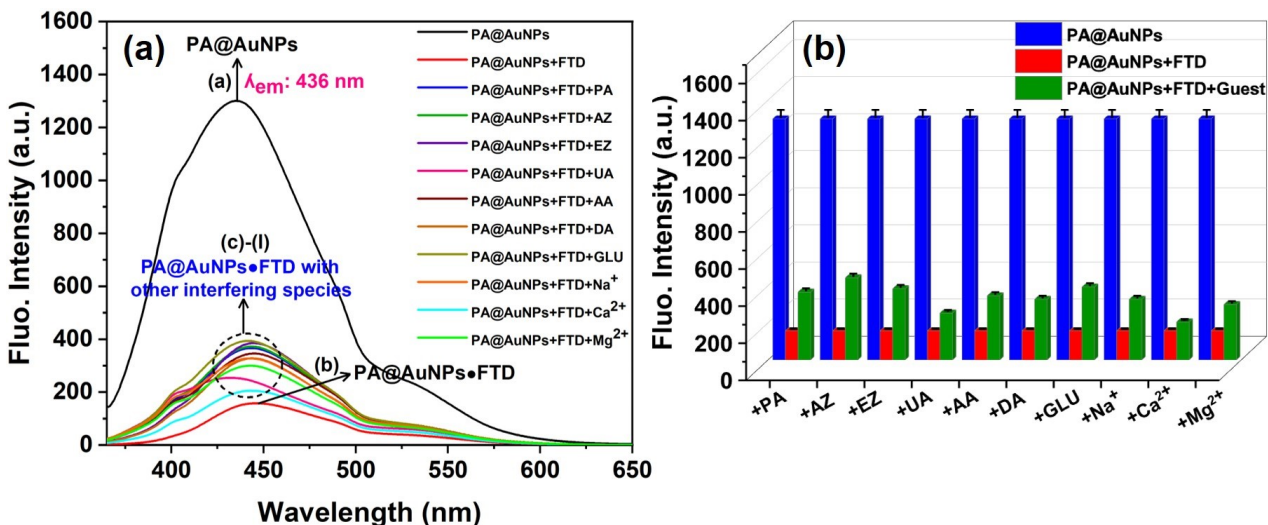

**Figure SI5.** (a) Fluorescence response for PA@AuNPs [1.0 mM] with other interfering compounds (100  $\mu\text{M}$ ) in the presence of FTD (1  $\mu\text{M}$ )-(b), paracetamol (PR)-(c), azithromycin (Az)-(d), erythromycin (EZ)-(e), uric acid (UA)-(f), ascarbic acid (AA)-(g), dopamine (DA)-(h), glucose (GLU)-(i), sodium ions (Na<sup>+</sup>)-(j), calcium ions (Ca<sup>2+</sup>)-(k), magnesium ions (Mg<sup>2+</sup>)-(l), (b) Corresponding bar diagram (STD = 3%).

## 2.5. Time effect

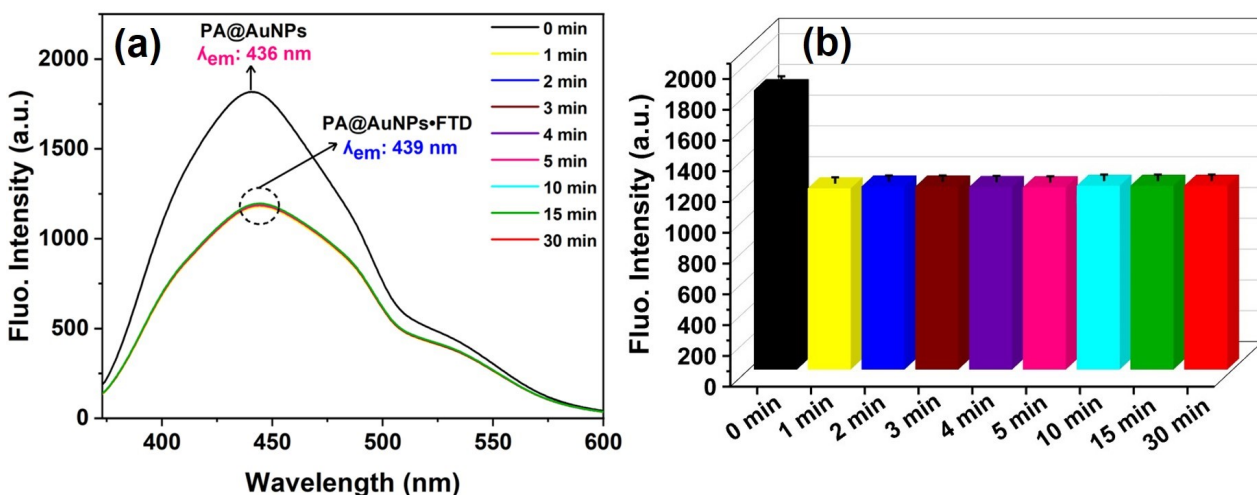

**Figure SI6.** (a) Time effect on the fluorescence intensity of PA@AuNPs [1.0 mM] upon sensing of FTD (100  $\mu\text{M}$ ) ( $\lambda_{ex}$  353 nm; slit width 5 nm). (b) Corresponding bar diagram (STD = 3%).

## 2.6. Reversibility study

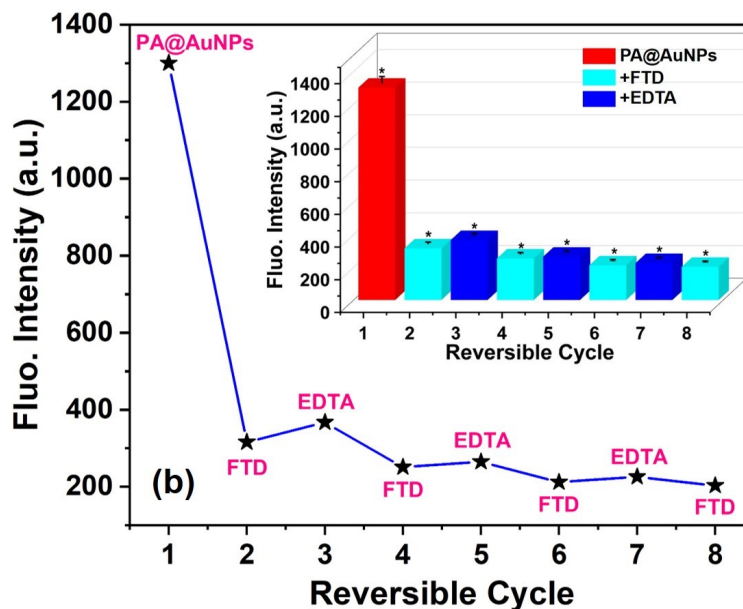

**Figure SI7.** (a) Reversible fluorescence emission spectrum of PA@AuNPs (1.0 mM) with the alternative addition of 100 μM FTD and EDTA ( $\lambda_{\text{ex}}$  353 nm; slit width for both excitation and emission is 5 nm). (b) Corresponding reversible cycle, (inset (b) the corresponding bar diagram) (STD = 3%).

## 2.7. pH effect

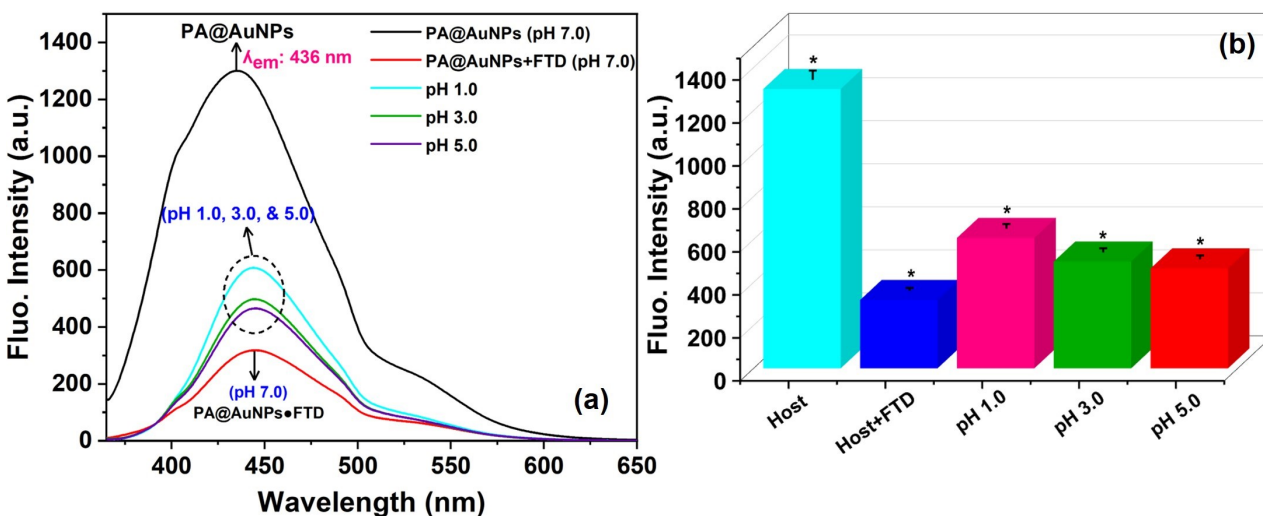

**Figure SI8.** (a) Fluorescence emission intensity changes of PA@AuNPs•FTD in acidic pH condition (pH 1 to 5) ( $\lambda_{\text{ex}}$  353 nm; slit width for both excitation and emission is 5 nm), and (b) Corresponding bar diagram (STD = 3%).



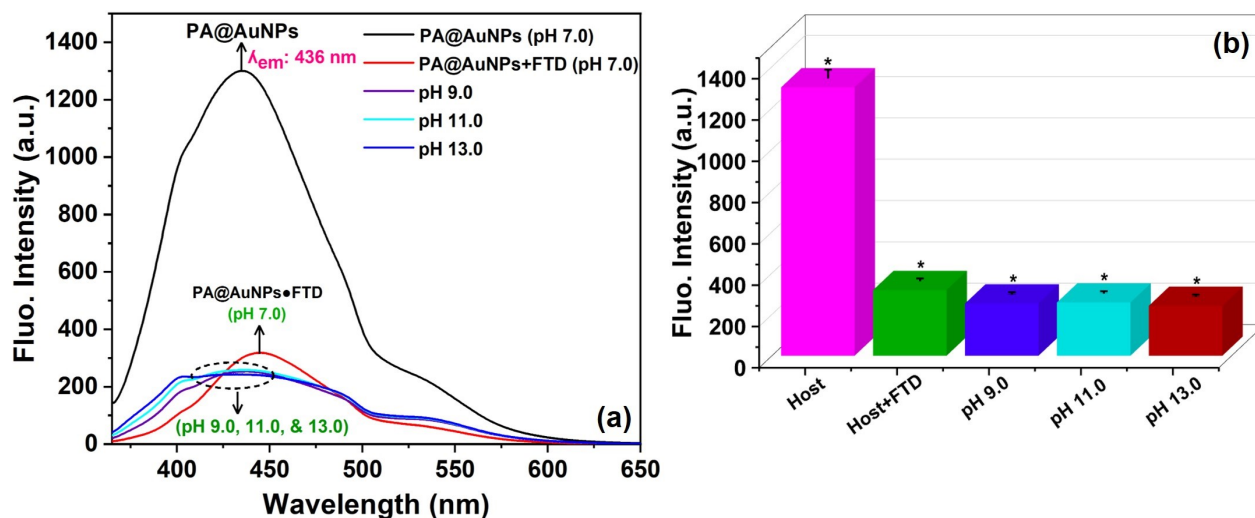

**Figure SI9.** (a) Fluorescence emission intensity changes of PA@AuNPs•FTD in basic pH condition (pH 9 to 13) ( $\lambda_{ex}$  353 nm; slit width for both excitation and emission is 5 nm), and (b) Corresponding bar diagram (STD = 3%).

## 2.8. HRTEM analysis

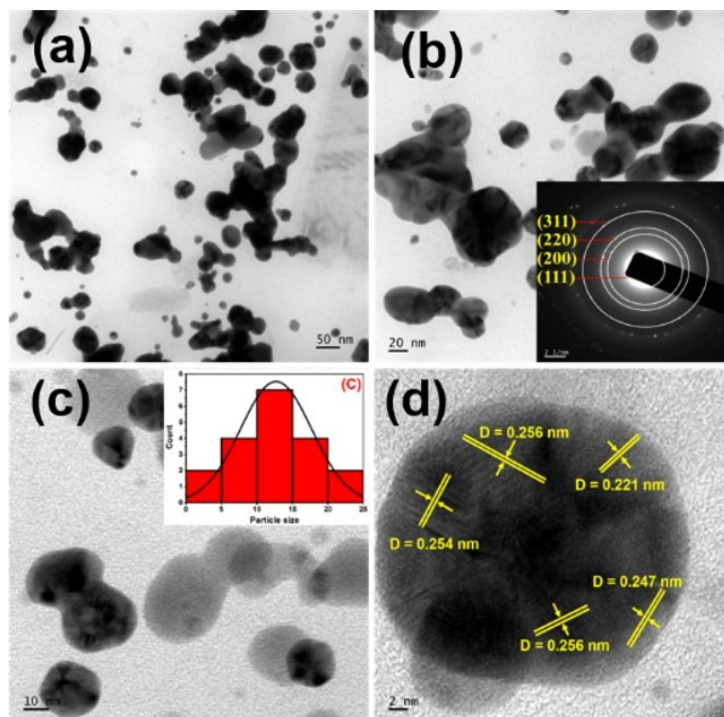

**Figure SI10.** (A) HRTEM images of PA@AuNPs in a different scale (a→d; 50, 20, 10, and 2 nm), (inset b) SAED pattern of PA@AuNPs, (inset c) histogram of PA@AuNPs of the average diameter of 10-15 nm, and (d) fringes with average 'd' space value of 0.248 nm;

2.9. FESEM and AFM analysis

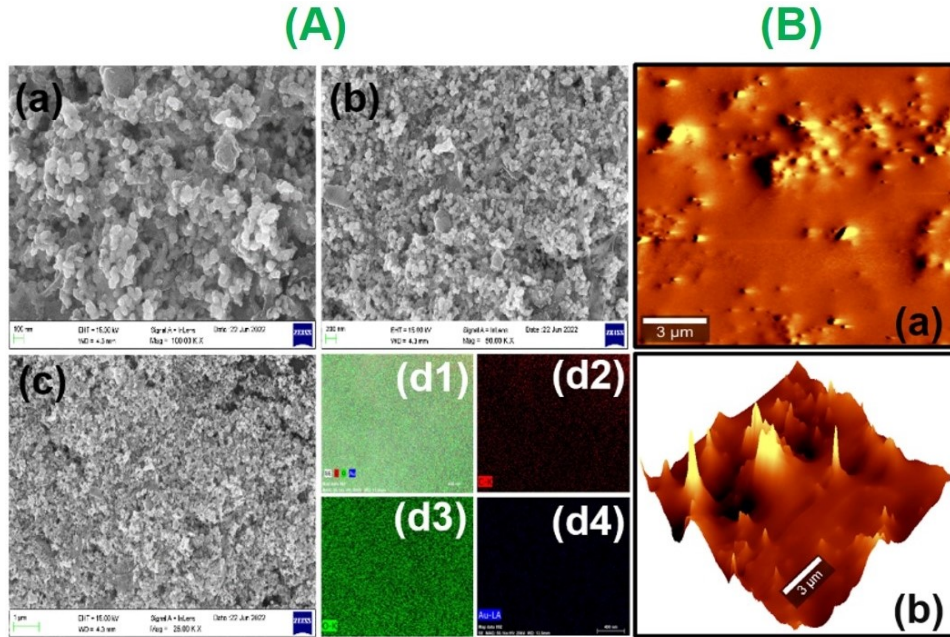

**Figure S111.** (A) FESEM images of PA@AuNPs (a) 1  $\mu\text{m}$ , (b) 200 nm, and (c) 100 nm scale, respectively, (d) elemental mapping of PA@AuNPs (d1), C (d2), O (d3), Au (d4); and (B) AFM images of PA@AuNPs in (a) 2D, and (b) 3D modes.

2.10. EDAX analysis

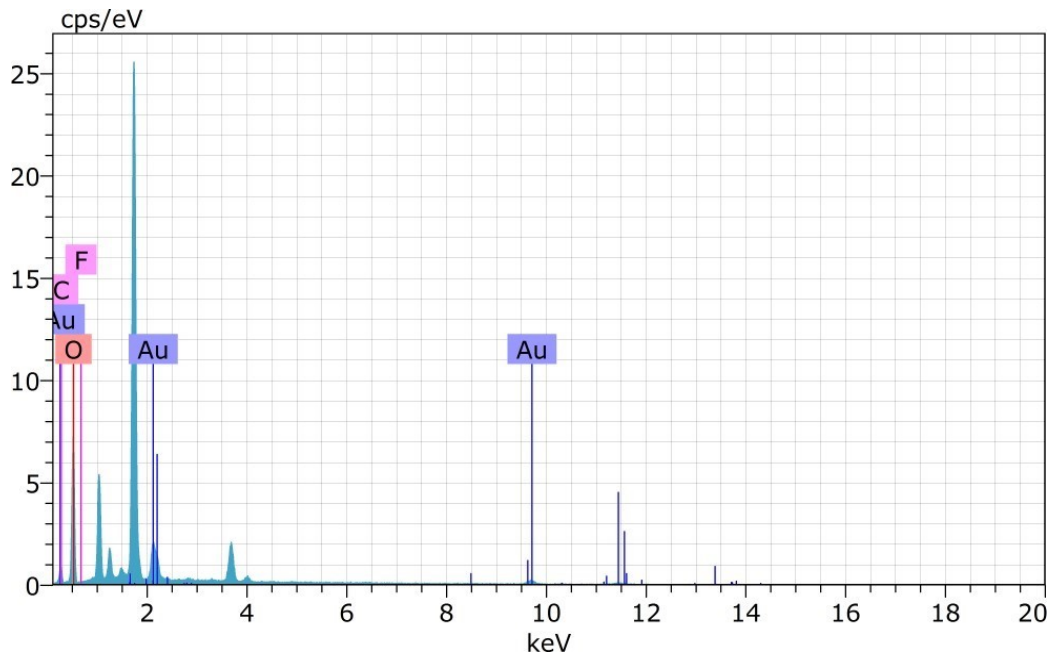

**Figure S112.** EDAX analysis of PA@AuNPs•FTD.



**Table S11.** Weight percentage of the elements present in PA@AuNPs•FTD.

Spectrum: BM 3084

| Element | Series     | unn. C [wt.%] | norm. C [wt.%] | Atom. C [at.%] | Error | Sigma |
|---------|------------|---------------|----------------|----------------|-------|-------|
| O       | 8 K-series | 30.12         | 60.55          | 78.50          |       | 3.92  |
| A       | 7 L-series | 14.16         | 28.47          | 3.00           |       | 0.55  |
| u       | 9 K-series | 5.11          | 10.27          | 17.73          |       | 1.01  |
| C       | 6 K-series |               |                |                |       |       |
| F       | 9 K-series | 0.35          | 0.71           | 0.78           |       | 0.19  |
| Total:  |            | 49.74         | 100.00         | 100.00         |       |       |

### 2.11. UV-Vis spectral studies

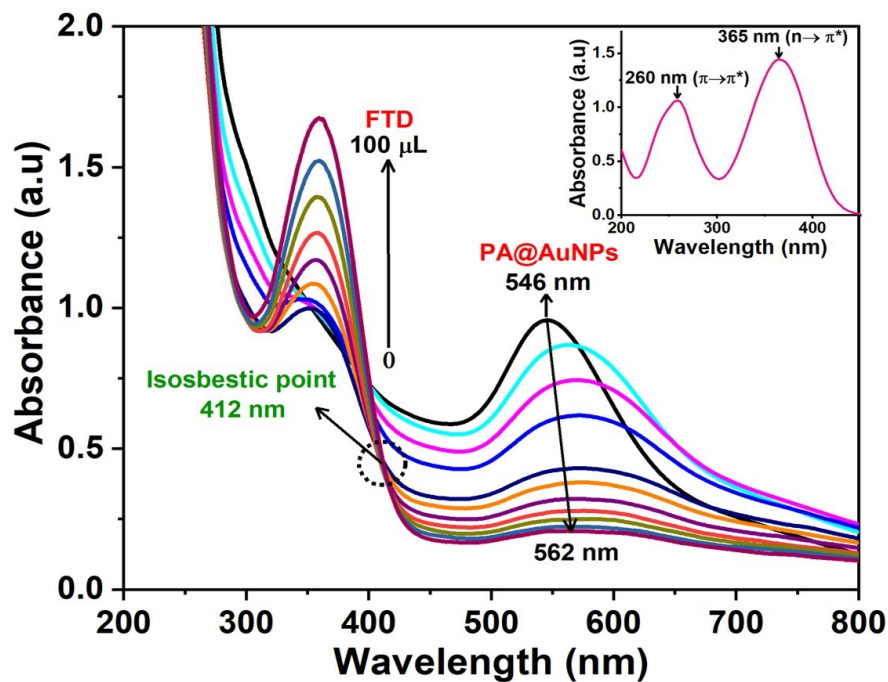

**Figure S113.** UV-visible absorption spectrum for the addition of FTD (1.0 mM) (0 – 100  $\mu$ L) into the PA@AuNPs solution (1.0 mM) (inset: UV-visible absorption spectrum of FTD).

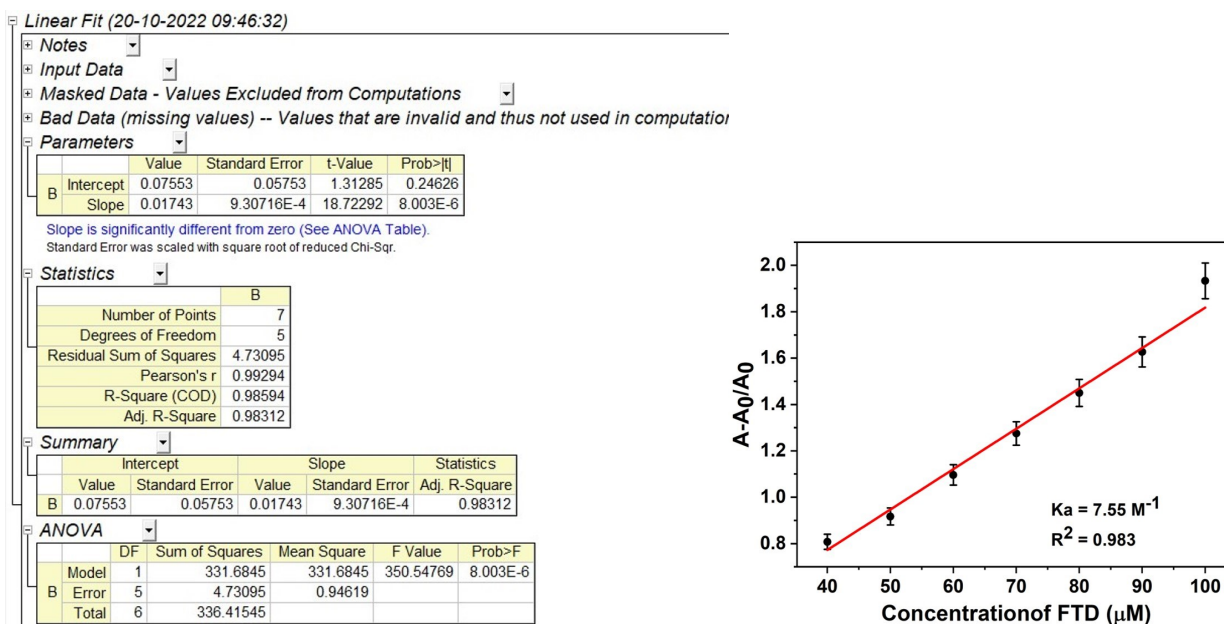

**Figure S114.** Absorption changes of PA@AuNPs (1 mM)  $[A-A_0/A_0]$  upon the addition of FTD (1 mM) FTD  $[Q]$ , binding constant ( $K_a$ ) calculated through linear fit ( $R^2 = 0.983$ ) (STD = 3%).

## 2.12. Zeta Potential

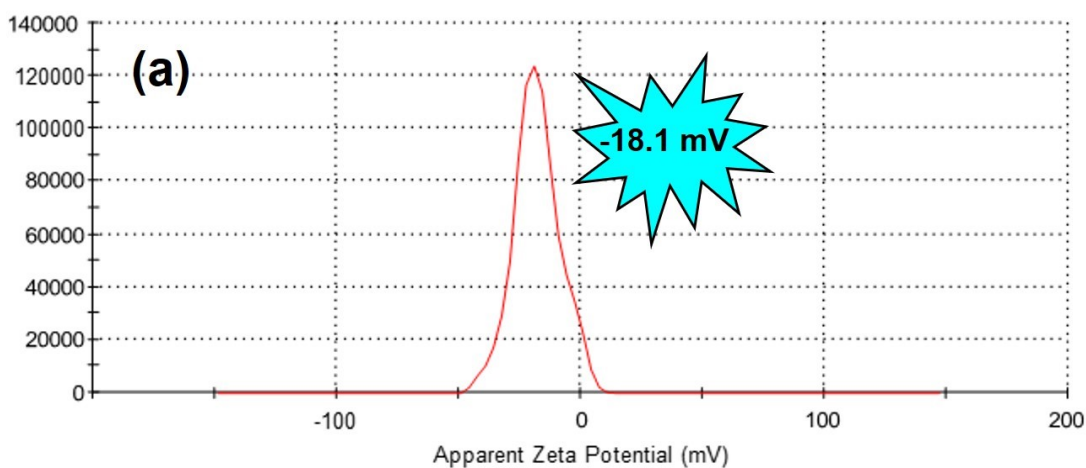

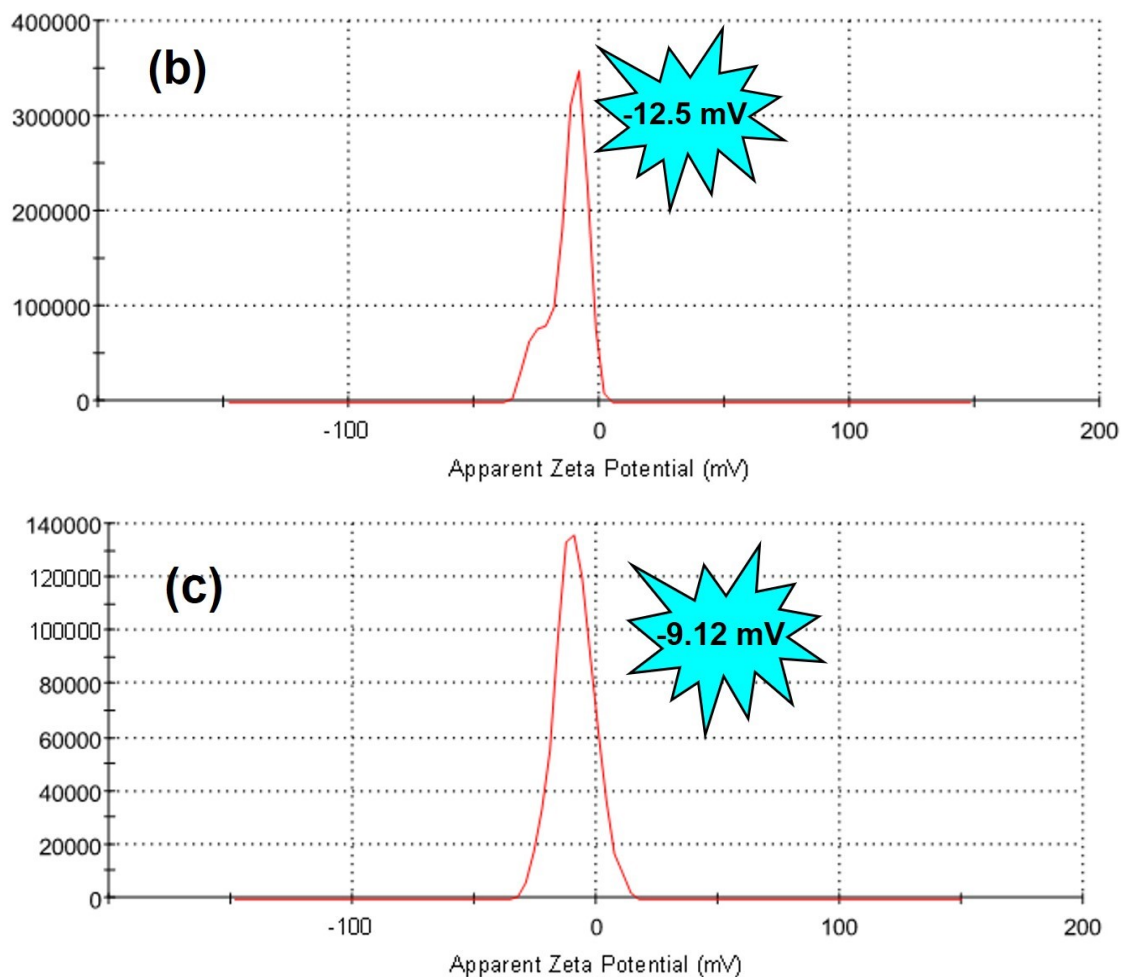

**Figure SI15.** (a) Zeta potential of bare PA@AuNPs, (b) PA@AuNPs+FTD (0.5  $\mu\text{M}$ ), and (c) PA@AuNPs+FTD (0.75  $\mu\text{M}$ ) .

### 3. DFT Calculation for PA@AuNPs•FTD

The interaction between PA@AuNPs and FTD molecules was investigated by using density functional theory, B3LYP/6-311G(d,p) level of theory. The ECP basis set, def2-TZVPP was employed for the Au atom. The selected structural parameters are listed in Table SI2.

**Table SI2.** The selected geometrical parameters (bond length in Å, angle in degrees) of isolated PA@AuNPs, FTD molecules, and interacting complex

| Parameter                | Isolated molecules |             | Interacting complex |
|--------------------------|--------------------|-------------|---------------------|
|                          | FTD                | PA@AuNPs    |                     |
| <b>R1(C58-O61)</b>       | <b>1.18</b>        | -           | <b>1.23</b>         |
| R2(C63-H69)              | 1.09               | -           | 1.09                |
| R3(C65-H71)              | 1.08               | -           | 1.08                |
| R4(O61-Au41)             | -                  | -           | 2.08                |
| <b>R5(O37-Au41)</b>      | -                  | <b>2.05</b> | <b>2.02</b>         |
| R6(C36-C37)              | -                  | 1.31        | 1.31                |
| R7(C36-C38)              | -                  | 1.22        | 1.23                |
| R8(C22-O39)              | -                  | 1.24        | 1.25                |
| R9(C9-O17)               | -                  | 1.24        | 1.24                |
| R10(C16-O19)             | -                  | 1.21        | 1.21                |
| <b>Θ1(O61-Au41-O37)</b>  | -                  | -           | <b>177</b>          |
| <b>Θ2(C36-O38...H69)</b> | -                  | -           | <b>127</b>          |
| <b>Θ3(C22-O39...H71)</b> | -                  | -           | <b>130</b>          |
| Θ4(C58-O61-Au41)         | -                  | -           | 131.1               |

|                      |       |       |        |
|----------------------|-------|-------|--------|
| Θ5(Au41-O37-C36)     | -     | 110.7 | 115    |
| Θ6(O37-C36-C23)      | -     | 114   | 112.9  |
| Θ7(O38-C36-C23)      | -     | 120.6 | 121.2  |
| Θ8(O39-C22-C23)      | -     | 122.4 | 122    |
| Θ9(O61-C58-O57)      | 124.9 | -     | 119.1  |
| Θ10(O61-C58-N59)     | 128   | -     | 130.1  |
| Θ11(N62-C63-H69)     | 124   | -     | 124.9  |
| Θ12(C64-C65-H71)     | 126.1 | -     | 126.4  |
| Θ13(C8-C20-C21)      | -     | 116.4 | 116.4  |
| Θ14(N57-N62-C63)     | 119.2 | -     | 115.4  |
| Θ1(C58-O61-Au51-O37) | -     | -     | 66.2   |
| Θ2(O61-Au41-O37-C36) | -     | -     | 64     |
| Θ3(C22-C21-C20-C8)   | -     | 112.7 | 113.5  |
| Θ4(C26-C21-C20-C8)   | -     | -71.2 | -70.74 |
| Θ5(C7-C8-C20-C21)    | -     | -72.1 | -70.6  |
| Θ6(C9-C8-C20-C21)    | -     | 112.2 | 113.3  |



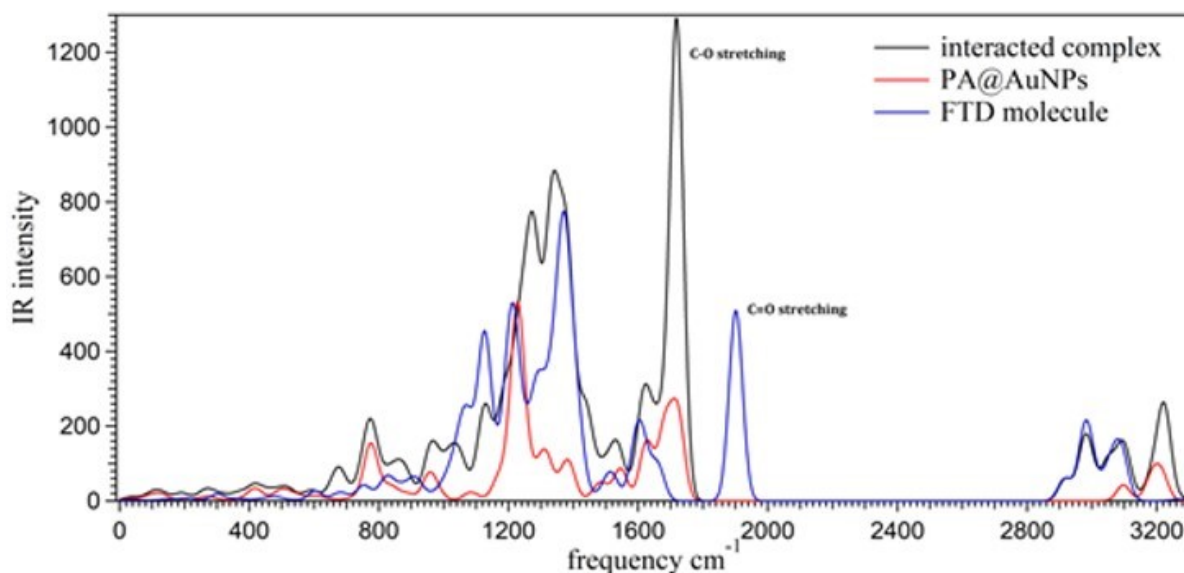

**Figure S116.** The calculated FTIR spectrums for PA@AuNPs, Furaltadone (FTD), and product complex.

The ground state density plot for frontier molecular orbital, highest occupied molecular orbital (HOMO), lowest unoccupied molecular orbital (LUMO), and two singly occupied molecular orbitals (SOMO) were calculated based on the optimized geometry of the product complex. The plot was made with the contour value of 0.03 a.u. The SOMOs were localized on naphthalene rings and O<sup>-</sup> atom of PA@AuNPs. Further, the HOMO is localized on the morpholine group of FTD and LUMO is localized on the free -COAu functional group of PA@AuNPs in the interacting complex. The energy gap between HOMO and LUMO is found as 2.47 eV.

**Figure SI17.** The ground state density plot of SOMO, HOMO, and LUMO molecular orbitals of the studied interacting complex.

| S. No. | Orbitals  | Interacting complex (PA@AuNPs•FTD)                                                   |
|--------|-----------|--------------------------------------------------------------------------------------|
| 1.     | SOMO<br>1 | 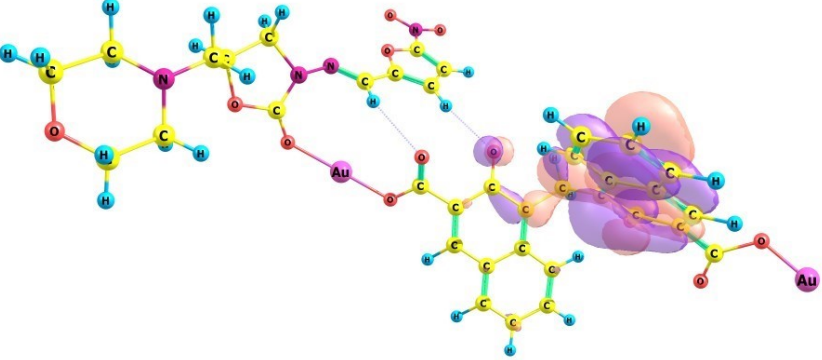   |
| 2.     | SOMO<br>2 |   |
| 3.     | HOMO      |  |

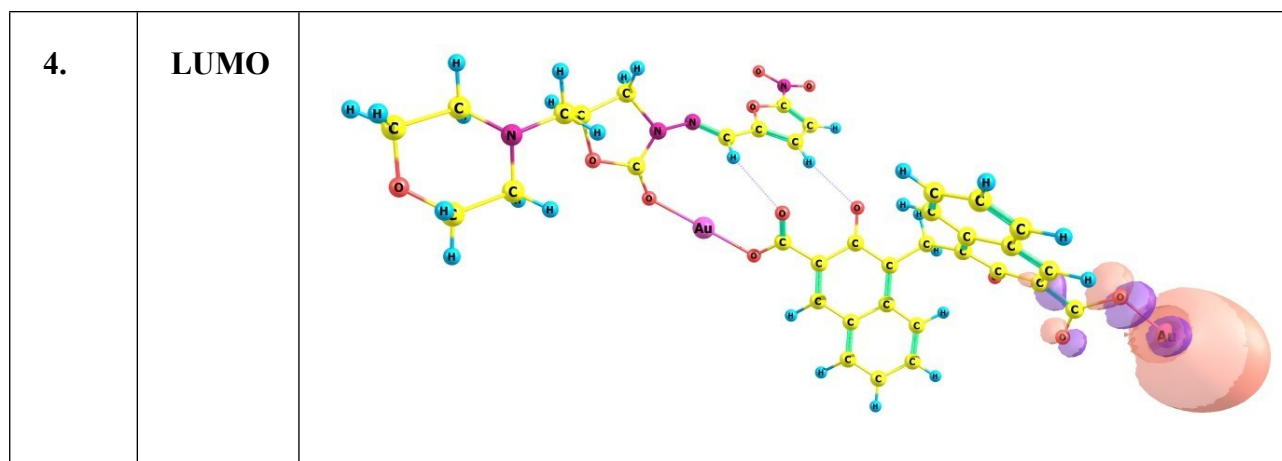

**Table SI3.** Comparison of nanostructured-based probes for furaltadone detection reported so far.

| S. No. | Material Used & Publication details                                                                         | LoD                      | Analyte Used                            | Method of detection          | Reference No. (in SI) |
|--------|-------------------------------------------------------------------------------------------------------------|--------------------------|-----------------------------------------|------------------------------|-----------------------|
| 1.     | Gold nanosubstrates<br><i>Eur Food Res Technol, 235 (2012) 555–561</i>                                      | 5 ppm                    | FTD & Furadantin                        | SERS                         | 1                     |
| 2.     | M-MWCNT (Magnetic multi-wall carbon nanotubes)<br><i>Water Science &amp; Technology 70.6 (2014) 964-971</i> | 320 $\mu\text{g.L}^{-1}$ | FTD                                     | Thermodynamic analysis       | 2                     |
| 3.     | MWCNT (Multi-wall carbon nanotubes)<br><i>Analytical and Bioanalytical Chemistry 410 (2018) 6573–6583</i>   | 0.012 $\mu\text{M}$      | Nitrofurans drugs (NFT, FTD, FZD & NFZ) | Electrochemical sensor (DPV) | 3                     |
| 4.     | Gold nanoparticles (AuNPs)<br><i>Microchemical</i>                                                          | 0.01 ng/mL               | FTD                                     | Signal enhanced ELISA        | 4                     |

|     |                                                                                                                                             |                                                     |     |                                                  |    |
|-----|---------------------------------------------------------------------------------------------------------------------------------------------|-----------------------------------------------------|-----|--------------------------------------------------|----|
|     | <i>Journal 159 (2020) 105414</i>                                                                                                            |                                                     |     |                                                  |    |
| 5.  | FeVO/P-rGO NCs<br><i>Applied Surface Science 569 (2021) 151046</i>                                                                          | 138 nM                                              | FTD | Electrochemical (CV, DPV & amperometric studies) | 5  |
| 6.  | SrMnO <sub>3</sub> /f-BN composite<br><i>Catalysts 12 (2022) 1494</i>                                                                       | 2.0 nM                                              | FTD | Electrochemical (voltammetric detection)         | 6  |
| 7.  | CuCoO <sub>2</sub><br><i>Int. J. Electrochem. Sci., 17 (2022) 220644</i>                                                                    | 1.79 nM                                             | FTD | Electrochemical (CV & DPV)                       | 7  |
| 8.  | Cu/Ni/TiO <sub>2</sub> /MWCNTs nanocomposites<br><i>Scientific Reports 12 (2022) 886</i>                                                    | 0.0949 μM                                           | FTD | Electrochemical & photocatalytic                 | 8  |
| 9.  | ZnO & ZnCo <sub>2</sub> O <sub>4</sub><br><i>Microchemical Journal 169 (2021) 106566</i>                                                    | 1.46 nM & 34.1 nM                                   | FTD | Electrochemical                                  | 9  |
| 10. | Co <sub>2</sub> SnO <sub>4</sub> /SnO <sub>2</sub> (Cobalt tin oxide/tin oxide)<br><i>Journal of Alloys and Compounds 882 (2021) 160750</i> | 39 nM                                               | FTD | Electrochemical detection                        | 10 |
| 11. | 2-hydroxy-1-naphthaldehyde<br><i>Food Additives &amp; Contaminants: Part A, 30 (2013) 2114–2122</i>                                         | 0.64 μg kg <sup>-1</sup> & 0.15 μg kg <sup>-1</sup> | FTD | HPLC and LC-MS/MS                                | 11 |

|     |                                                                                                                                                     |                         |                             |                           |              |
|-----|-----------------------------------------------------------------------------------------------------------------------------------------------------|-------------------------|-----------------------------|---------------------------|--------------|
| 12. | Histidine-Cu NCs<br><i>Chemical Papers</i> 76 (2022) 7855–7863                                                                                      | 0.9948 $\mu\text{M}$    | FTD                         | Fluorescence spectroscopy | 12           |
| 13. | Metal-regulated $d^{10}$ coordination polymers constructed from bis(pyridyl)-bis(amide) ligands <i>New Journal of Chemistry</i> 47 (2023) 9701-9707 | $9.41 \times 10^{-8}$ M | FTD                         | Fluorescence spectroscopy | 13           |
| 14. | Tryptophan-protected gold nanoclusters <i>Spectrochimica Acta Part A: Molecular and Biomolecular Spectroscopy</i> 308 (2024) 123748                 | 0.087 $\mu\text{M}$     | FTD                         | Fluorescence spectroscopy | 14           |
| 15. | PA@AuNPs                                                                                                                                            | 9.78 nM & 6.07 nM       | FTD in Normal & Blood serum | Fluorescence spectroscopy | Current work |

## References

- (1) Xie, Y.; Zhu, X.; Sun, Y.; Wang, H.; Qian, H.; Yao, W. Rapid detection method for nitrofurantoin antibiotic residues by surface-enhanced Raman Spectroscopy. *European Food Research and Technology* **2012**, 235, 555–561.
- (2) Chen, X.; Xiong, Z. H. Kinetics and thermodynamics of the sorption of furaltadone from aqueous solutions on magnetic multi-walled carbon nanotubes. *Water science and technology* **2014**, 70, 964–971.
- (3) Chiu, S-H.; Su, Y-L.; Le, A. V. T.; Cheng, S-H. Nanocarbon material-supported conducting poly (melamine) nanoparticle-modified screen-printed carbon electrodes for highly sensitive determination of nitrofurantoin drugs by adsorptive stripping voltammetry. *Analytical and bioanalytical chemistry* **2018**, 410, 6573–6583.



- (4) Yan, C.; Teng, J.; Liu, F.; Yao, B.; Xu, Z.; Yao, L.; Chen, W. Signal amplified enzyme-linked immunosorbent assay with gold nanoparticles for sensitive detection of trace furaltadone metabolite. *Microchemical Journal* **2020**, 159, 105414–105419.
- (5) Rajakumaran, R.; Babulal, S. M.; Chen, S. M.; Sukanya, R.; Karthik, R.; Shafi, P. M.; Shim, J. J.; Yo-Shiuan, C. Ingenious design of iron vanadate engulfed 3D porous reduced graphene oxide nanocomposites as a reliable electrocatalyst for the selective amperometric determination of furaltadone in aquatic environments. *Applied Surface Science* **2021**, 569, 151046–151058.
- (6) Venkatesh, K.; Rajakumaran, R.; Chen, S. M.; Karuppasamy, P.; Banach, A.; Al-Onazi, W. A.; Sonadevi, S.; Krishnan, N. P.; Yang, C. C.; Karuppiyah, C. SrMnO<sub>3</sub>/Functionalized h-BN Composite Modified Disposable Sensor for the Voltammetric Determination of Furaltadone Antibiotic Drug. *Catalysts* **2022**, 12, 1494–1511.
- (7) Mariappan, K.; Chen, T. W.; Chen, S. M.; Tseng, T. W.; Bian, Y.; Sun, T. T.; Jiang, J.; Yu, J. Fabrication of Hexagonal CuCoO<sub>2</sub> Modified Screen-Printed Carbon Electrode for the Selective Electrochemical Detection of Furaltadone. *Int. J. Electrochem. Sci* **2022**, 17, 220644–220659.
- (8) Vasu, D.; Karthi Keyan, A.; Sakthinathan, S.; Chiu, T. W. Investigation of electrocatalytic and photocatalytic ability of Cu/Ni/TiO<sub>2</sub>/MWCNTs Nanocomposites for detection and degradation of antibiotic drug Furaltadone. *Scientific Reports* **2022**, 12, 886–892.
- (9) Amalraj, A. J. J.; Murthy, U. N.; Sea-Fue, W. Ultrasensitive electrochemical detection of an antibiotic drug furaltadone in fish tissue with a ZnO-ZnCo<sub>2</sub>O<sub>4</sub> self-assembled nano-heterostructure as an electrode material. *Microchemical Journal* **2021**, 169, 106566–106575.
- (10) Balamurugan, K.; Rajakumaran, R.; Chen, S. M.; Karthik, R.; Shim, J. J.; Shafi, P. M. Massive engineering of spinel cobalt tin oxide/tin oxide-based electrocatalyst for the selective voltammetric determination of antibiotic drug furaltadone in water samples *Journal of Alloys and Compounds*. **2021**, 15, 160750–160761.
- (11) Sheng, L. Q.; Chen, M. M.; Chen, S. S.; Du, N. N.; Liu, Z. D.; Song, C. F.; Qiao, R. High-performance liquid chromatography with fluorescence detection for the determination of

nitrofurantoin metabolites in pork muscle. *Food Additives & Contaminants: Part A* **2013**, 30, 2114–2122.

(12) Zhang, S.; Jin, M. L.; Gao, Y. X.; Li, W. Q.; Wang, X. Y.; Li, X. X.; Qiao, J. Q.; Peng, Y. Histidine-capped fluorescent copper nanoclusters: an efficient sensor for determination of furaltadone in aqueous solution. *Chemical Papers*, **2022**, 76, 7855–7863.

(13) Geng, J.; Sun, J.; Lin, H.; Wang, X. Metal-regulated d 10 coordination polymers constructed from bis (pyridyl)-bis (amide) ligands with different spacers as high-efficiency fluorescence sensors for identifying chlortetracycline and furaltadone. *New Journal of Chemistry*, **2023**, 47, 9701–9707.

(14) Cai, Z.; Li, H.; Yang, X.; Zhang, M.; Guo, J.; Su, Y.; Liu, T. Blue-emitting tryptophan-protected gold nanoclusters acted as a sensitive nanosensor for fluorescence sensing and visual imaging detection of furaltadone. *Spectrochim. Acta A Mol. Biomol. Spectrosc.*, 308 (2024) 123748.

(15) For PA@AuNPs characterization refer to A. Sowndarya, T. Daniel Thangadurai, D. Nataraj, Morphology-transforming AuNPs-based Fluorescent probe for Ultra-low sensitive detection of Levofloxacin in Urine samples at pH 7.0 through Excimer formation, *J. Mol. Liquids* 407 (2024) 125156.
